# Supplementary material for: Cis‐acting DNA elements flanking the variable major protein expression site of Borrelia hermsii are required for murine persistence
Source: PubMed Central journal article supplement (PMC6011951; doi:10.1002/mbo3.569), 2017-12-17
Supplement: MBO3-7-e00569-s001.pdf [file MBO3-7-e00569-s001.pdf]

| Primer | Sequence (5' to 3') <sup>a</sup>                                  |
|--------|-------------------------------------------------------------------|
| P237   | <b>ATATAATTTGATATTAGTACAAATCC</b> CCGATATCGCCGTGGCG <sup>b</sup>  |
| P259   | <b>ATATAATTTGATATTAGTACAAATCC</b> CCACTAGTAACGGCCGCC <sup>b</sup> |
| P274   | GTGCCC <u>GGATCCT</u> TAAACATCATATCCAAAAATTAAGCTAAATA             |
| P275   | CCGCGGCGCATATGTCGTTGAAAGTTAATATAAAAA                              |
| P395   | ATTGGCGCGCCAAGGATAGCAGAAGTACTCTTTCCTACGCC                         |
| P396   | GA <u>ACTCGAGCCT</u> AACGCAACGAGGGCTGA                            |
| P422   | TAGGTTTAAACCCAGCACACTGGCGGC                                       |
| P423   | TAG <u>AGTACT</u> <u>CTCGAGGCC</u> ACGTTGTGTCTCAAAATCTCTG         |
| P424   | TAGAGTACT <u>GGCGCGCC</u> CGTGAGTTTTCGTTCCACTGAGC                 |
| P425   | TAGGTTTAAACTGCCCGCTTTCAGTCG                                       |
| P626   | ATTGGCGCGCCGCTCCTTTAGCAACAGTGACATAATCAGC                          |
| P627   | GA <u>ACTCGAGC</u> TTTAGCCATTCTCTTAATGCTATAGCTCTTGC               |
| P541   | TAG <u>GCTAGCG</u> CAAGAGCTATAGCATTAAAGAGAATGGCTAAAG              |
| P542   | TAGT <u>GCGCAT</u> CCCCAGTGCTTCTTTTCCTTCC                         |
| P233   | ATTCATATGAACACCCTCTATATCACAAATT                                   |
| P537   | GTCGTTAGTATTTTTTTGGAGAGAAGTATC                                    |
| P854   | GTTCTGTTCAGGACTTATAGGAGTATC                                       |
| P855   | CCATGTTGGAATTTAATCGC                                              |
| P558   | <u>CATATGA</u> ATAGCGGTGGGGTTGC                                   |
| P559   | <u>GGATCC</u> CTAGTTACTAGTAGTACTTTAGGGATATTCTGC                   |

<sup>a</sup> Restriction enzyme sites underlined.

<sup>b</sup> Half of the *B. hermsii* lpE27 replicated telomere in bold.
