# Supplementary material for: Cis‐acting DNA elements flanking the variable major protein expression site of Borrelia hermsii are required for murine persistence
Source: PubMed Central journal article supplement (PMC6011951; doi:10.1002/mbo3.569), 2017-12-17
Supplement: MBO3-7-e00569-s002.pdf [file MBO3-7-e00569-s002.pdf]

| Strain                                      | $\beta_1^a$ | 95% CI      | p-value <sup>b</sup> |
|---------------------------------------------|-------------|-------------|----------------------|
| Wild type                                   | 0.032       | 0.026-0.039 | -                    |
| <i>Bh</i> $\Delta$ <i>vmp</i> <sub>EX</sub> | 0.029       | 0.021-0.037 | 0.37                 |
| <i>Bh</i> ::Comp                            | 0.032       | 0.030-0.034 | 0.99                 |
| <i>Bh</i> ::UHS <sub>AS</sub>               | 0.033       | 0.031-0.036 | 0.77                 |
| <i>Bh</i> ::DHS $\Delta$ IR                 | 0.029       | 0.022-0.035 | 0.30                 |

<sup>a</sup> Slope was calculated for the period of 72 hours of exponential growth (days 1-4 post subculture)

<sup>b</sup> p-value of slopes compared to the wild type strain
