# Supplementary material for: Cis‐acting DNA elements flanking the variable major protein expression site of Borrelia hermsii are required for murine persistence
Source: PubMed Central journal article supplement (PMC6011951; doi:10.1002/mbo3.569), 2017-12-17
Supplement: MBO3-7-e00569-s003.pdf [file MBO3-7-e00569-s003.pdf]

| Strain                         | Mean Maximum Cell Density <sup>a</sup> | 95% Confidence Interval                       | p-value <sup>b</sup> |
|--------------------------------|----------------------------------------|-----------------------------------------------|----------------------|
| WT                             | 3.4 x 10 <sup>8</sup>                  | 1.8 x 10 <sup>8</sup> – 5.1 x 10 <sup>8</sup> | –                    |
| <i>Bh</i> ::Comp               | 2.6 x 10 <sup>8</sup>                  | 2.1 x 10 <sup>8</sup> – 3.0 x 10 <sup>8</sup> | 0.37                 |
| <i>Bh</i> ::UHS <sub>AS</sub>  | 2.4 x 10 <sup>8</sup>                  | 1.4 x 10 <sup>8</sup> – 3.5 x 10 <sup>8</sup> | 0.37                 |
| <i>Bh</i> ::DHS <sub>ΔIR</sub> | 3.5 x 10 <sup>8</sup>                  | 2.7 x 10 <sup>8</sup> – 4.4 x 10 <sup>8</sup> | 0.96                 |

<sup>a</sup> Cell density is equivalent to spirochetes per mL of blood

<sup>b</sup> p-value of mean maximum cell density compared to the wild type strain
