# Supplementary material for: Cis‐acting DNA elements flanking the variable major protein expression site of Borrelia hermsii are required for murine persistence
Source: PubMed Central journal article supplement (PMC6011951; doi:10.1002/mbo3.569), 2017-12-17
Supplement: MBO3-7-e00569-s006.pdf [file MBO3-7-e00569-s006.pdf]

|                       |                         |      |        |                                                                                                        |      |
|-----------------------|-------------------------|------|--------|--------------------------------------------------------------------------------------------------------|------|
|                       |                         |      | 1      |                                                                                                        | 100  |
| Bh::UHS <sub>AS</sub> | <i>vmp<sub>Ex</sub></i> | Inoc | (1)    | TAGGCTAGCGCAAGAGCTATAGCATTAAAGAGAATGGCTAAAGGTGATAAATTTGATTTTTTTTTTTTTTAACTTTGTAAACTTTGAAAGTTGAGGTATAAT |      |
| Recovered             | <i>vmp<sub>Ex</sub></i> | SCID | (1)    | -----AACTTTGTAAACTTTGAAAGTTGAGGTATAAT                                                                  |      |
|                       |                         |      | 101    |                                                                                                        | 200  |
| Bh::UHS <sub>AS</sub> | <i>vmp<sub>Ex</sub></i> | Inoc | (101)  | TATGACGCAACATTAAGTAGGAGGAAAGCATTTCAATGAGGAAGAGGATCAGCGGATCATAATGACTTTATTTATGGTATTAGTAAGCTGTAATAGCGG    |      |
| Recovered             | <i>vmp<sub>Ex</sub></i> | SCID | (33)   | TATGACGCAACATTAAGTAGGAGGAAAGCATTTCAATGAGGAAGAGGATCAGCGGATCATAATGACTTTATTTATGGTATTAGTAAGCTGTAATAGCGG    |      |
|                       |                         |      | 201    |                                                                                                        | 300  |
| Bh::UHS <sub>AS</sub> | <i>vmp<sub>Ex</sub></i> | Inoc | (201)  | TGGGGTTGCGGAAGACCCCTCAGAGTAAATTTTTAAAGTCAGCAATAGACTTAGGTAATGATTTTTTAAATGTGTTTACATCATTTGGAGATATAGTTTTCC |      |
| Recovered             | <i>vmp<sub>Ex</sub></i> | SCID | (133)  | TGGGGTTGCGGAAGACCCCTCAGAGTAAATTTTTAAAGTCAGCAATAGACTTAGGTAATGATTTTTTAAATGTGTTTACATCATTTGGAGATATAGTTTTCC |      |
|                       |                         |      | 301    |                                                                                                        | 400  |
| Bh::UHS <sub>AS</sub> | <i>vmp<sub>Ex</sub></i> | Inoc | (301)  | AAGGTATTAGGTTTTAGTACAGAGACAAAAAGTCTGATGTTGGGGCTTATTTTAAAGACAATACAAGATACTATACAAGGCACTAAGGACAAGCTTAATA   |      |
| Recovered             | <i>vmp<sub>Ex</sub></i> | SCID | (233)  | AAGGTATTAGGTTTTAGTACAGAGACAAAAAGTCTGATGTTGGGGCTTATTTTAAAGACAATACAAGATACTATACAAGGCACTAAGGACAAGCTTAATA   |      |
|                       |                         |      | 401    |                                                                                                        | 500  |
| Bh::UHS <sub>AS</sub> | <i>vmp<sub>Ex</sub></i> | Inoc | (401)  | AAATTGTTACTGACATGAAGAGAGAAGGAAATCCTAATGCTTCTGCAACTGAGACTGCGGTAAAAACACTAATTGATAATACTCTTGATAAGATAATAGA   |      |
| Recovered             | <i>vmp<sub>Ex</sub></i> | SCID | (333)  | AAATTGTTACTGACATGAAGAGAGAAGGAAATCCTAATGCTTCTGCAACTGAGACTGCGGTAAAAACACTAATTGATAATACTCTTGATAAGATAATAGA   |      |
|                       |                         |      | 501    |                                                                                                        | 600  |
| Bh::UHS <sub>AS</sub> | <i>vmp<sub>Ex</sub></i> | Inoc | (501)  | AGGTGCTGAGACTGCAAGTGAGGCTATTGGTGATGCTGGTGACCCAATTGGTAATGTTGCTGCTGGTGGTCTGGTGCGGGTACAGGTGCTATTGGGGAT    |      |
| Recovered             | <i>vmp<sub>Ex</sub></i> | SCID | (433)  | AGGTGCTGAGACTGCAAGTGAGGCTATTGGTGATGCTGGTGACCCAATTGGTAATGTTGCTGCTGGTGGTCTGGTGCGGGTACAGGTGCTATTGGGGAT    |      |
|                       |                         |      | 601    |                                                                                                        | 700  |
| Bh::UHS <sub>AS</sub> | <i>vmp<sub>Ex</sub></i> | Inoc | (601)  | GGTGGTATAATCTAATAAATGGAATTAAGGCAATTGTAGAAGTAGTACTTAAAGAAGGGAATGCTGAGGCTGGAGATGGTAAAAAGGCCGATGCTCTTG    |      |
| Recovered             | <i>vmp<sub>Ex</sub></i> | SCID | (533)  | GGTGGTATAATCTAATAAATGGAATTAAGGCAATTGTAGAAGTAGTACTTAAAGAAGGGAATGCTGAGGCTGGAGATGGTAAAAAGGCCGATGCTCTTG    |      |
|                       |                         |      | 701    |                                                                                                        | 800  |
| Bh::UHS <sub>AS</sub> | <i>vmp<sub>Ex</sub></i> | Inoc | (701)  | GAGCAAGAGGTGCTAATGCTGGTGATGCAGGAAAGTTATTTGGTAATACTGGTAATAATGGTGCTATTGATTCTGCAGATAATGCAAAGAAAGCAGGTGC   |      |
| Recovered             | <i>vmp<sub>Ex</sub></i> | SCID | (633)  | GAGCAAGAGGTGCTAATGCTGGTGATGCAGGAAAGTTATTTGGTAATACTGGTAATAATGGTGCTATTGATTCTGCAGATAATGCAAAGAAAGCAGGTGC   |      |
|                       |                         |      | 801    |                                                                                                        | 900  |
| Bh::UHS <sub>AS</sub> | <i>vmp<sub>Ex</sub></i> | Inoc | (801)  | TGATGCAGCAAAGCAGTAGGGGCAGTAACAGGTGCTGATATATTACAAGCTATTTCTAAAGATGGTGGTATGCTGCTAAATTAGCTAAGAATAGTGCT     |      |
| Recovered             | <i>vmp<sub>Ex</sub></i> | SCID | (733)  | TGATGCAGCAAAGCAGTAGGGGCAGTAACAGGTGCTGATATATTACAAGCTATTTCTAAAGATGGTGGTATGCTGCTAAATTAGCTAAGAATAGTGCT     |      |
|                       |                         |      | 901    |                                                                                                        | 1000 |
| Bh::UHS <sub>AS</sub> | <i>vmp<sub>Ex</sub></i> | Inoc | (901)  | ACCGTTCAGGTGACTGGTGTGCTGTTGATGTTAAAGATGCGGTTATAGCAGGAGGAATTGCACTCAGAGCAATGGCAAAGGGTGGTAAATTTGCTAATG    |      |
| Recovered             | <i>vmp<sub>Ex</sub></i> | SCID | (833)  | ACCGTTCAGGTGACTGGTGTGCTGTTGATGTTAAAGATGCGGTTATAGCAGGAGGAATTGCACTCAGAGCAATGGCAAAGGGTGGTAAATTTGCTAATG    |      |
|                       |                         |      | 1001   |                                                                                                        | 1100 |
| Bh::UHS <sub>AS</sub> | <i>vmp<sub>Ex</sub></i> | Inoc | (1001) | ATAAGGATGCTGTTAATGCTGATGTTGTTACTGCAGTTAAAGGAGCAACAGTAAGTGCAGTAATAAGCACTAGATAACATTAAGCTAATAAGAAA        |      |
| Recovered             | <i>vmp<sub>Ex</sub></i> | SCID | (933)  | ATAAGGATGCTGTTAATGCTGATGTTGTTACTGCAGTTAAAGGAGCAACAGTAAGTGCAGTAATAAGCACTAGATAACATTAAGCTAATAAGAAA        |      |
|                       |                         |      | 1101   |                                                                                                        | 1200 |
| Bh::UHS <sub>AS</sub> | <i>vmp<sub>Ex</sub></i> | Inoc | (1101) | AACAATTGACGCAGGCCCTAAAACAGTTAAAGAAGCTATGAAAATTAATGCTAATGATACTCCTATAACTCCTGAGCAGAATATCCCTAAAGCTACTACT   |      |
| Recovered             | <i>vmp<sub>Ex</sub></i> | SCID | (1033) | AACAATTGACGCAGGCCCTAAAACAGTTAAAGAAGCTATGAAAATTAATGCTAATGATACTCCTATAACTCCTGAGCAGAATATCCCTAAAGCTACTACT   |      |
|                       |                         |      | 1201   |                                                                                                        | 1300 |
| Bh::UHS <sub>AS</sub> | <i>vmp<sub>Ex</sub></i> | Inoc | (1201) | AGTAACTAGTTAAGGATAAAATATAAAGGATAAAGTCAATGTAAGGGAAAAGCTTTTCTTGTTTTTAAATGCAGGAGTGAGTTTCTCTGATTAAGTAAGCT  |      |
| Recovered             | <i>vmp<sub>Ex</sub></i> | SCID | (1133) | AGTAACTAGTTAAGGATAAAATATAAAGGATAAAGTCAATGTAAGGGAAAAGCTTTTCTTGTTTTTAAATGCAGGAGTGAGTTTCTCTGATTAAGTAAGCT  |      |
|                       |                         |      | 1301   |                                                                                                        | 1400 |
| Bh::UHS <sub>AS</sub> | <i>vmp<sub>Ex</sub></i> | Inoc | (1301) | GTAAGAGCAGGGAAAAATAAAGTCAAAAAGGAATAGGAAGCTAGGAGCGTAATGCTCTTAGCTTCTAATGTTATTTAGGGAGTGTTTCTTTGTATATAAA   |      |
| Recovered             | <i>vmp<sub>Ex</sub></i> | SCID | (1233) | GTAAGAGCAGGGAAAAATAAAGTCAAAAAGGAATAGGAAGCTAGGAGCGTAATGCTCTTAGCTTCTAATGTTATTTAGGGAGTGTTTCTTTGTATATAAA   |      |
|                       |                         |      | 1401   |                                                                                                        | 1500 |
| Bh::UHS <sub>AS</sub> | <i>vmp<sub>Ex</sub></i> | Inoc | (1401) | ATTGTTTATATGAGTAAAGATTGAATATAAATAATTGCAAGTATGATATTAAGAGTATGTTTTTATTGTAATCAAATAATTAATACTTTAAAAGTAAGCT   |      |
| Recovered             | <i>vmp<sub>Ex</sub></i> | SCID | (1333) | ATTGTTTATATGAGTAAAGATTGAATATAAATAATTGCAAGTATGATATTAAGAGTATGTTTTTATTGTAATCAAATAATTAATACTTTAAAAGTAAGCT   |      |
|                       |                         |      | 1501   |                                                                                                        | 1576 |
| Bh::UHS <sub>AS</sub> | <i>vmp<sub>Ex</sub></i> | Inoc | (1501) | AAATGTGTGGTAAGGGCAGCAAAAGGGAAATTTGGGATAGATGTTGGAAGGAAAAGCACTGGGGATGCGCATAG                             |      |
| Recovered             | <i>vmp<sub>Ex</sub></i> | SCID | (1433) | AAATGTGTGGTAAGGGCA-----                                                                                |      |
