# Supplementary material for: Cis‐acting DNA elements flanking the variable major protein expression site of Borrelia hermsii are required for murine persistence
Source: PubMed Central journal article supplement (PMC6011951; doi:10.1002/mbo3.569), 2017-12-17
Supplement: MBO3-7-e00569-s008.pdf [file MBO3-7-e00569-s008.pdf]

|                                                         |      |        |                                                                                                        |      |      |
|---------------------------------------------------------|------|--------|--------------------------------------------------------------------------------------------------------|------|------|
|                                                         |      |        | 1                                                                                                      |      | 100  |
| <i>Bh</i> ::DHS <sub>ΔIR</sub> <i>vmp</i> <sub>Ex</sub> | Inoc | (1)    | TAGGCTAGCGCAAGAGCTATAGCATTAAGAGAATGGCTAAAGGTGATAAATTTGATTTTTTTTTTTTTTAACTTTGTAACTTTGAAAGTTGAGGTATAAT   |      |      |
| Recovered <i>vmp</i> <sub>Ex</sub>                      | SCID | (1)    | -----AACTTTGTAACTTTGAAAGTTGAGGTATAAT                                                                   |      |      |
|                                                         |      |        | 101                                                                                                    |      | 200  |
| <i>Bh</i> ::DHS <sub>ΔIR</sub> <i>vmp</i> <sub>Ex</sub> | Inoc | (101)  | GCTAATGCATAAGTTAAAAGGAGGCACGTAAAAAATGAGAAAAAGAATAAGTGAATAATAATGACTTTATTTATGGTATTAGTAAGCTGTAATAGCGG     |      |      |
| Recovered <i>vmp</i> <sub>Ex</sub>                      | SCID | (33)   | GCTAATGCATAAGTTAAAAGGAGGCACGTAAAAAATGAGAAAAAGAATAAGTGAATAATAATGACTTTATTTATGGTATTAGTAAGCTGTAATAGCGG     |      |      |
|                                                         |      |        | 201                                                                                                    |      | 300  |
| <i>Bh</i> ::DHS <sub>ΔIR</sub> <i>vmp</i> <sub>Ex</sub> | Inoc | (201)  | TGGGGTTGCGGAAGACCCTCAGAGTAAATTTTTAAAGTCAGCAATAGACTTAGGTAATGATTTTTTAAATGTGTTTACATCATTTGGAGATATAGTTTCC   |      |      |
| Recovered <i>vmp</i> <sub>Ex</sub>                      | SCID | (133)  | TGGGGTTGCGGAAGACCCTCAGAGTAAATTTTTAAAGTCAGCAATAGACTTAGGTAATGATTTTTTAAATGTGTTTACATCATTTGGAGATATAGTTTCC   |      |      |
|                                                         |      |        | 301                                                                                                    |      | 400  |
| <i>Bh</i> ::DHS <sub>ΔIR</sub> <i>vmp</i> <sub>Ex</sub> | Inoc | (301)  | AAGGTATTAGTTTTAGTACAGAGACAAAAAGTCTGATGTTGGGGCTTATTTTAAAGACAATACAAGATACTATACAAGGCACTAAGGACAAGCTTAATA    |      |      |
| Recovered <i>vmp</i> <sub>Ex</sub>                      | SCID | (233)  | AAGGTATTAGTTTTAGTACAGAGACAAAAAGTCTGATGTTGGGGCTTATTTTAAACAATCCAAGATACTATACAAGGCACTAAGGACAAGCTTAATA      |      |      |
|                                                         |      |        | 401                                                                                                    |      | 500  |
| <i>Bh</i> ::DHS <sub>ΔIR</sub> <i>vmp</i> <sub>Ex</sub> | Inoc | (401)  | AAATTGTTACTGACATGAAGAGAGAAGGAAATCCTAATGCTTCTGCAACTGAGACTGCGGTAAAAACACTAATTGATAATACTCTTGATAAGATAATAGA   |      |      |
| Recovered <i>vmp</i> <sub>Ex</sub>                      | SCID | (333)  | AAATTGTTACTGACATGAAGAGAGAAGGAAATCCTAATGCTTCTGCAACTGAGACTGCGGTAAAAACACTAATTGATAATACTCTTGATAAGATAATAGA   |      |      |
|                                                         |      |        | 501                                                                                                    |      | 600  |
| <i>Bh</i> ::DHS <sub>ΔIR</sub> <i>vmp</i> <sub>Ex</sub> | Inoc | (501)  | AGGTGCTGAGACTGCAAGTGAGGCTATTGGTGATGCTGGTGACCCAATTGGTAATGTTGCTGCTGGTGGTGCCTGGTGCAGGTGCTATTGGGGAT        |      |      |
| Recovered <i>vmp</i> <sub>Ex</sub>                      | SCID | (433)  | AGGTGCTGAGACTGCAAGTGAGGCTATTGGTGATGCTGGTGACCCAATTGGTAATGTTGCTGCTGGTGGTGCCTGGTGCAGGTGCTATTGGGGAT        |      |      |
|                                                         |      |        | 601                                                                                                    |      | 700  |
| <i>Bh</i> ::DHS <sub>ΔIR</sub> <i>vmp</i> <sub>Ex</sub> | Inoc | (601)  | GGTGTGATAATCTAATAAATGGAATTAAGGCAATTGTAGAAGTAGTACTTAAAGAAGGGAATGCTGAGGCTGGAGATGGTAAAAAGGCCGATGCTCTTG    |      |      |
| Recovered <i>vmp</i> <sub>Ex</sub>                      | SCID | (533)  | GGTGTGATAATCTAATAAATGGAATTAAGGCAATTGTAGAAGTAGTACTTAAAGAAGGGAATGCTGAGGCTGGAGATGGTAAAAAGGCCGATGCTCTTG    |      |      |
|                                                         |      |        | 701                                                                                                    |      | 800  |
| <i>Bh</i> ::DHS <sub>ΔIR</sub> <i>vmp</i> <sub>Ex</sub> | Inoc | (701)  | GAGCAAGAGGTGCTAATGCTGGTGATGCAGGAAAGTTATTTGGTAATACTGGTAATAATGGTGCATTGATTCTGCAGATAATGCAAAGAAAGCAGGTGC    |      |      |
| Recovered <i>vmp</i> <sub>Ex</sub>                      | SCID | (633)  | GAGCAAGAGGTGCTAATGCTGGTGATGCAGGAAAGTTATTTGGTAATACTGGTAATAATGGTGCATTGATTCTGCAGATAATGCAAAGAAAGCAGGTGC    |      |      |
|                                                         |      |        | 801                                                                                                    |      | 900  |
| <i>Bh</i> ::DHS <sub>ΔIR</sub> <i>vmp</i> <sub>Ex</sub> | Inoc | (801)  | TGATGCAGCAAAGCAGTAGGGGCAGTAACAGGTGCTGATATATACAAGCTATTTCTAAAGATGGTGGTGCCTGCTAAATTAGCTAAGAATAGTGCT       |      |      |
| Recovered <i>vmp</i> <sub>Ex</sub>                      | SCID | (733)  | TGATGCAGCAAAGCAGTAGGGGCAGTAACAGGTGCTGATATATACAAGCTATTTCTAAAGATGGTGGTGCCTGCTAAATTAGCTAAGAATAGTGCT       |      |      |
|                                                         |      |        | 901                                                                                                    |      | 1000 |
| <i>Bh</i> ::DHS <sub>ΔIR</sub> <i>vmp</i> <sub>Ex</sub> | Inoc | (901)  | ACCGTTCAGGTGACTGGTGTGCTGTTGATGTTAAAGATGCGGTTATAGCAGGAGGAATTGCACTCAGAGCAATGGCAAAGGGTGGTAAATTTGCTAATG    |      |      |
| Recovered <i>vmp</i> <sub>Ex</sub>                      | SCID | (833)  | ACCGTTCAGGTGACTGGTGTGCTGTTGATGTTAAAGATGCGGTTATAGCAGGAGGAATTGCACTCAGAGCAATGGCAAAGGGTGGTAAATTTGCTAATG    |      |      |
|                                                         |      |        | 1001                                                                                                   |      | 1100 |
| <i>Bh</i> ::DHS <sub>ΔIR</sub> <i>vmp</i> <sub>Ex</sub> | Inoc | (1001) | ATAAGGATGCTGTTAATGCTGATGTTGTTACTGCAGTTAAAGGAGCAACAGTAAGTGCAGTAACTAAAGCAC TAGATA CATTAACTATTGCAATAAGAAA |      |      |
| Recovered <i>vmp</i> <sub>Ex</sub>                      | SCID | (933)  | ATAAGGATGCTGTTAATGCTGATGTTGTTACTGCAGTTAAAGGAGCAACAGTAAGTGCAGTAACTAAAGCAC TAGATA CATTAACTATTGCAATAAGAAA |      |      |
|                                                         |      |        | 1101                                                                                                   |      | 1200 |
| <i>Bh</i> ::DHS <sub>ΔIR</sub> <i>vmp</i> <sub>Ex</sub> | Inoc | (1101) | AACAATTGACGCAGGCCTTAAAACAGTTAAAGAAGCTATGAAAATTAATGCTAATGATACTCTATAACTCTGAGCAGAATATCCCTAAAGCTACTACT     |      |      |
| Recovered <i>vmp</i> <sub>Ex</sub>                      | SCID | (1033) | AACAATTGACGCAGGCCTTAAAACAGTTAAAGAAGCTATGAAAATTAATGCTAATGATACTCTATAACTCTGAGCAGAATATCCCTAAAGCTACTACT     |      |      |
|                                                         |      |        | 1201                                                                                                   |      | 1300 |
| <i>Bh</i> ::DHS <sub>ΔIR</sub> <i>vmp</i> <sub>Ex</sub> | Inoc | (1201) | AGTAACTAGTTAAGGATAAATATAAAGGATAAAGTCATTGTAAGGGAAAAGCTTTTCTTGTTTTTAATGCAGGAGTGTAGTTTCTCTGATTAAGTAAGCT   |      |      |
| Recovered <i>vmp</i> <sub>Ex</sub>                      | SCID | (1133) | AGTAACTAGTTAAGGATAAATATAAAGGATAAAGTCATTGTAAGGGAAAAGCTTTTCTTGTTTTTAATGCAGGAGTGTAGTTTCTCTGATTAAGTAAGCT   |      |      |
|                                                         |      |        | 1301                                                                                                   |      | 1400 |
| <i>Bh</i> ::DHS <sub>ΔIR</sub> <i>vmp</i> <sub>Ex</sub> | Inoc | (1301) | GTAAGAGCAGGGAAAAATAAAGTCAAAAAGGAATAAATGTTATTTAGGGAGTGTTCTTTGTATATAAAAATTGTTTATATGAGTAAAGATTGAATATAAA   |      |      |
| Recovered <i>vmp</i> <sub>Ex</sub>                      | SCID | (1233) | GTAAGAGCAGGGAAAAATAAAGTCAAAAAGGAATAAATGTTATTTAGGGAGTGTTCTTTGTATATAAAAATTGTTTATATGAGTAAAGATTGAATATAAA   |      |      |
|                                                         |      |        | 1401                                                                                                   |      | 1500 |
| <i>Bh</i> ::DHS <sub>ΔIR</sub> <i>vmp</i> <sub>Ex</sub> | Inoc | (1401) | TAATTGCAAGTATGATATTAAGAGTATGTTTTTATTGTAATCAAATAATTAATACTTTAAAAGTAAGCTAAATGTGTGGTAAGGCAGCAAAGGGAAAT     |      |      |
| Recovered <i>vmp</i> <sub>Ex</sub>                      | SCID | (1333) | TAATTGCAAGTATGATATTAAGAGTATGTTTTTATTGTAATCAAATAATTAATACTTTAAAAGTAAGCTAAATGTGTGGTAA-----                |      |      |
|                                                         |      |        | 1501                                                                                                   | 1545 |      |
| <i>Bh</i> ::DHS <sub>ΔIR</sub> <i>vmp</i> <sub>Ex</sub> | Inoc | (1501) | TGGGATAGATGTTGGAAGGAAAAGAAGCACTGGGGATGCGCATAG                                                          |      |      |
| Recovered <i>vmp</i> <sub>Ex</sub>                      | SCID | (1415) | -----                                                                                                  |      |      |
