# Supplementary material for: Cis‐acting DNA elements flanking the variable major protein expression site of Borrelia hermsii are required for murine persistence
Source: Microbiologyopen. 2017 Dec 17;7(3):e00569. doi: 10.1002/mbo3.569 (PMC6011951; doi:10.1002/mbo3.569)
Supplement: Supplementary file 4 [file MBO3-7-e00569-s004.pdf]

|           |                   |      |        |                                                                                                       |      |
|-----------|-------------------|------|--------|-------------------------------------------------------------------------------------------------------|------|
|           |                   |      | 1      |                                                                                                       | 100  |
| Bh::Comp  | vmp <sub>Ex</sub> | Inoc | (1)    | -----GCTAGCGCAAGAGCTATAGCATTAAAGAGAATGGCTAAAGGTGATAAATTTGATTTTTTTTTTTTTTAACTTTGTAACTTTGAAAGTTGAGG     |      |
| Recovered | vmp <sub>Ex</sub> | C3H  | (1)    | TAGGCCGGCACTAGTGAAGAGCTATAGCATTAAAGAGAATGGCTAAAGGTGATAAATTTGATTTTTTTTTTTTTTAACTTTGTAACTTTGAAAGTTGAGG  |      |
|           |                   |      | 101    |                                                                                                       | 200  |
| Bh::Comp  | vmp <sub>Ex</sub> | Inoc | (92)   | TATAATGCTAATGCATAAGTTAAAAGGAGGCACGTAAAAAATGAGAAAAAGAATAAGTGCAATAATAATGACTTTATTTATGGTATTAGTAAGCTGTAA   |      |
| Recovered | vmp <sub>Ex</sub> | C3H  | (101)  | TATAATGCTAATGCATAAGTTAAAAGGAGGCACGTAAAAAATGAGAAAAAGAATAAGTGCAATAATAATGACTTTATTTATGGTATTAGTAAGCTGTAA   |      |
|           |                   |      | 201    |                                                                                                       | 300  |
| Bh::Comp  | vmp <sub>Ex</sub> | Inoc | (192)  | TAGCGGTGGGGTTGCGGAAGACCCTCAGAGTAAATTTTTAAAGTCAGCAATAGACTTAGGTAATGATTTTTTAAATGTGTTTACATCATTTGGAGATATA  |      |
| Recovered | vmp <sub>Ex</sub> | C3H  | (201)  | TAGCGGTGGGGTTGCGGAAGACCCTCAGAGTAAATTTTTAAAGTCAGCAATAGACTTAGGTAATGATTTTTTAAATGTGTTTACATCATTTGGAGATATA  |      |
|           |                   |      | 301    |                                                                                                       | 400  |
| Bh::Comp  | vmp <sub>Ex</sub> | Inoc | (292)  | GTTTCCAAGGTATTAGGTTTTAGTACAGAGACAAAAAGTCTGATGTTGGGGCTTATTTTAAGACAATACAAGATACTATACAAGGCACTAAGGACAAGC   |      |
| Recovered | vmp <sub>Ex</sub> | C3H  | (301)  | GTTTCCAAGGTATTAGGTTTTAGTACAGAGACAAAAAGTCTGATGTTGGGGCTTATTTTAAGACAATACAAGATACTATACAAGGCACTAAGGACAAGC   |      |
|           |                   |      | 401    |                                                                                                       | 500  |
| Bh::Comp  | vmp <sub>Ex</sub> | Inoc | (392)  | TTAATAAAATTGTTACTGACATGAAGAGAGAAGGAAATCCTAATGCTTCTGCAACTGAGACTGCGGTAAAAACACTAATTGATAATACTCTTGATAAGAT  |      |
| Recovered | vmp <sub>Ex</sub> | C3H  | (401)  | TTAATAAAATTGTTACTGACATGAAGAGAGAAGGAAATCCTAATGCTTCTGCAACTGAGACTGCGGTAAAAACACTAATTGATAATACTCTTGATAAGAT  |      |
|           |                   |      | 501    |                                                                                                       | 600  |
| Bh::Comp  | vmp <sub>Ex</sub> | Inoc | (492)  | AATAGAAGGTGCTGAGACTGCAAGTGAGGCTATTGGTGATGCTGGTGACCCAATTGGTAATGTTGCTGCTGGTGGTGCTGGTGCGGGTACAGGTGCTATT  |      |
| Recovered | vmp <sub>Ex</sub> | C3H  | (501)  | AATAGAAGGTGCTAAGACCGTTAGTGCTATTGGAGATGCTAGTGACCCAATTGCTAATGTTGCTGCTCAGAATGCTGCTG-----GTGCTGCT         |      |
|           |                   |      | 601    |                                                                                                       | 700  |
| Bh::Comp  | vmp <sub>Ex</sub> | Inoc | (592)  | GGGGATGGTGTTGATAATCTAATAAATGGAATTAAGGCAATTGTAGAAGTAGTACTTAAAGA--AGGGAATGCTGAGGCTGGAGATGGTAAAAAGGCCG   |      |
| Recovered | vmp <sub>Ex</sub> | C3H  | (592)  | GGGACTGAAGTTGACAACTAGTAAAAGGAATAAAGACAATTGTAGACGTGGTACTTAAAGGTGTAGGAAGTCTAATGCTGGTGATGATAAAAGGCTG     |      |
|           |                   |      | 701    |                                                                                                       | 800  |
| Bh::Comp  | vmp <sub>Ex</sub> | Inoc | (689)  | ATGCTCT---TGGAGCAAGAGGTGCTAATGCTGGTGATGCAGGAAAG--TTATTTGGTAATACTGGTAATAATGGTGCTATTGATTCTGCAGATAATGCA  |      |
| Recovered | vmp <sub>Ex</sub> | C3H  | (692)  | AAGATGGCAATACTGCAAGAACTGCTGCTGCTGGCGATGGTGAAGCGGGTAAATTATT--TACTGCTGGTGCAAGGTGCTGCTGGTGATGCTAATAATGCA |      |
|           |                   |      | 801    |                                                                                                       | 900  |
| Bh::Comp  | vmp <sub>Ex</sub> | Inoc | (784)  | AAGAAAGCAGGTGCTGATGCAGCAAAAGCAGTAGGGGCAGTAACAGGTGCTGATATATTACAAGCTATTTCTAAAGATGGTGGTGATGCTGCTAAATTAG  |      |
| Recovered | vmp <sub>Ex</sub> | C3H  | (790)  | AAAAAAGTTGCAGCTGATGCAGCAAAAGCAGTAGGAGCTGTAAGTGGTGCTGACATATTACAAGCTATGATTAAAGATAATGGTGATGCTGCTAAATTAG  |      |
|           |                   |      | 901    |                                                                                                       | 1000 |
| Bh::Comp  | vmp <sub>Ex</sub> | Inoc | (884)  | CTAAGAATAGTGCTACCGTTCAGGTGACTGGTGTTGCTGTTGATGTTAAAGATGCGGTTATAGCAGGAGGAATTGCACTCAGAGCAATGGCAAAGGGTGG  |      |
| Recovered | vmp <sub>Ex</sub> | C3H  | (890)  | -----CTACTGCTCAAAATGCTGGTGCTGCCCT-----AAAGATGGAGCTATTGCAGGAGGTATAGCTTTAAGAGTTATGGCAAAGGGTGG           |      |
|           |                   |      | 1001   |                                                                                                       | 1100 |
| Bh::Comp  | vmp <sub>Ex</sub> | Inoc | (984)  | TAAATTTGCTAATGATAAGGATGCTGTTAATGCTGATGTTGTTACTGCAGTTAAAGGAGCAACAGTAAGTGCAAGTAAAGCACTAGATACATTAAGT     |      |
| Recovered | vmp <sub>Ex</sub> | C3H  | (972)  | TAAATTTGCTGGCCCTAG---TGCTGCTGCTGATGATGCTGTTACTGCAATTAAGGAGCAGCAATAAGTTCAGTAACTAAAGCATTAGATACATTAAGT   |      |
|           |                   |      | 1101   |                                                                                                       | 1200 |
| Bh::Comp  | vmp <sub>Ex</sub> | Inoc | (1084) | ATTGCAATAAGAAAAACAATTGACGCAGGCCTTAAACAGTTAAAGAAGCTATGAAAATTAATGCTAATGATACTCCTATAACTCCTGAGCAGAATATCC   |      |
| Recovered | vmp <sub>Ex</sub> | C3H  | (1069) | ATTGCAATAAGAAAAACAATTGATGTGGGACTTAAACCGTTAAAGAAGCTATGAAAATTAATGCTAATGATACTCCTATAACTCCTGAACAGAGCGCCC   |      |
|           |                   |      | 1201   |                                                                                                       | 1300 |
| Bh::Comp  | vmp <sub>Ex</sub> | Inoc | (1184) | CTAAAGCTACTACTAGTAACTAGTTAAGGATAAATATAAAGGATAAAGTCATTGTAAGGGAAAAGCTTTTCTTGTTTTAATGCAGGAGTGAGTTTCTC    |      |
| Recovered | vmp <sub>Ex</sub> | C3H  | (1169) | CTAAAGGCACTACTAATAACTAGTTAAGGATAAGTATAAAGGATAAAGTTATTGTAAGGGAAAAGCTTTTCTTGTTTTAATGCAGGAGTGAGTTTCTC    |      |
|           |                   |      | 1301   |                                                                                                       | 1400 |
| Bh::Comp  | vmp <sub>Ex</sub> | Inoc | (1284) | TGATTAAGTAAGCTGTAAGAGCAGGGAAAAATAAAGTCAAAAAGGAATAGGAAGCTAGGAGCGTAATGCTCTTAGCTTCTAATGTTATTTAGGGAGTGTT  |      |
| Recovered | vmp <sub>Ex</sub> | C3H  | (1269) | TGATTAAGTAAGCTGTAAGAGCAGGGAAAAATAAAGTCAAAAAGGAATAGGAAGCTAGGAGCGTAATGCTCTTAGCTTCTAATGTTATTTAGGGAGTGTT  |      |
|           |                   |      | 1401   |                                                                                                       | 1500 |
| Bh::Comp  | vmp <sub>Ex</sub> | Inoc | (1384) | TCTTTGTATATAAAATTGTTTATATGAGTAAAGATTGAATATAAATAAATTGCAAGTATGATATTAAGAGTATGTTTTTATTGTAATCAAATAATTAATAC |      |
| Recovered | vmp <sub>Ex</sub> | C3H  | (1369) | TCTTTGTATATAAAATTGTTTATATGAGTAAAGATTGAATATAAATAAATTGCAAGTATGATATTAAGAGTATGTTTTTATTGTAATCAAATAATTAATAC |      |
|           |                   |      | 1501   |                                                                                                       | 1587 |
| Bh::Comp  | vmp <sub>Ex</sub> | Inoc | (1484) | TTTAAAAGTAAGCTAAATGTGTGGTAAGGGCAGCAAAAGGGAAATTGGGATAGATGTTGGAAGGAAAAGAAGCACTGGGGATGCGCA               |      |
| Recovered | vmp <sub>Ex</sub> | C3H  | (1469) | TTTAAAAGTAAGCTAAATGTGTGGTAAGGGCAGCAAAAGGGAAATTGGGATAGATGTTGGAAGGAAAAGAAGCACTGGGAGCCGCC                |      |

## Mouse 4

|           |                   |      |        |                                                                                                       |   |  |  |      |
|-----------|-------------------|------|--------|-------------------------------------------------------------------------------------------------------|---|--|--|------|
|           |                   |      |        |                                                                                                       | 1 |  |  | 100  |
| Bh::Comp  | vmp <sub>Ex</sub> | Inoc | (1)    | -----GCTAGCGCAAGAGCTATAGCATTAAGAGAATGGCTAAAGGTGATAAATTGATTTTTTTTTTTTTTAACTTTGTAAACTTTGAAAGTTGAGG      |   |  |  |      |
| Recovered | vmp <sub>Ex</sub> | C3H  | (1)    | TAGGCCGGCCTAGTGAAGAGCTATAGCATTAAGAGAATGGCTAAAGGTGATAAATTGATTTTTTTTTTTTTTAACTTTGTAAACTTTGAAAGTTGAGG    |   |  |  |      |
|           |                   |      |        | 101                                                                                                   |   |  |  | 200  |
| Bh::Comp  | vmp <sub>Ex</sub> | Inoc | (92)   | TATAATGCTAATGCATAAGTTAAAAGGAGGCACGTAAAAAATGAGAAAAAGAATAAGTGCAATAAT-AATGACTT-----TATTATGGTATT          |   |  |  |      |
| Recovered | vmp <sub>Ex</sub> | C3H  | (101)  | TATAATGCTAATGCATAAGTTAAAAGGAGGCACGTAAAAAATGAGAAAAAGAATAAGTGCAATAATTAATAAGTTAAATATAAGTATAATGATGATGAT   |   |  |  |      |
|           |                   |      |        | 201                                                                                                   |   |  |  | 300  |
| Bh::Comp  | vmp <sub>Ex</sub> | Inoc | (180)  | AGT-----AAGCTGTAATAGCGG-----TGGGGTTGCGGAAGACCCTCAGAGTAAATTTTAAAGTCAGCAATA---                          |   |  |  |      |
| Recovered | vmp <sub>Ex</sub> | C3H  | (201)  | AGTTGTTCTAATGATAGGATGTGGACAACAGGCAGTAGAAGCAGGGAAGGATGGCGCAGCAGCAGCTACAGGGGAAGAAGTTTAAAGTGAAGTACTAATG  |   |  |  |      |
|           |                   |      |        | 301                                                                                                   |   |  |  | 400  |
| Bh::Comp  | vmp <sub>Ex</sub> | Inoc | (244)  | GACTTAGGTAATGATTTTTTAAATGTGTTTACATCATTTGGAGATATAGTTCCAAGGTATTAGGTTTTAG-----TACAGAGACAAAAAGTCTGATG     |   |  |  |      |
| Recovered | vmp <sub>Ex</sub> | C3H  | (301)  | GAAGTGGGAAAAAGTGCTGAGAATGCTTTTTATTTCATTATGGCTTTAGTCTCAGATACATTAGGCTTAAGAGTGACTAAAGATACAAAGAAGAATGAAG  |   |  |  |      |
|           |                   |      |        | 401                                                                                                   |   |  |  | 500  |
| Bh::Comp  | vmp <sub>Ex</sub> | Inoc | (338)  | TTGGGGCTTATTTTAAGACAATACAAGATA--CTATACAAGGCACTA-----AGGACAAGCT-TAATAAAATTGTTACTGACATGAAGAGAGAAGGAAAT  |   |  |  |      |
| Recovered | vmp <sub>Ex</sub> | C3H  | (401)  | TGGGAGGTTATTTTAACAGCCTAGGTGGTAAGCTTGGAAAAGCATCAGATGAATTAGAAGAAGTAGCAAAAAGTCAGAAGTAGAAGGAGCTAAAGATGG   |   |  |  |      |
|           |                   |      |        | 501                                                                                                   |   |  |  | 600  |
| Bh::Comp  | vmp <sub>Ex</sub> | Inoc | (430)  | CCTAAT-GCTTCTGCAACTGAGACTGCGGTAAAAACACTAATTGATAATACTCTTGATAAGATAATAGAAGGTGCTGAGACTGCAAGTGAGGCTATTGGT  |   |  |  |      |
| Recovered | vmp <sub>Ex</sub> | C3H  | (501)  | ACCAATAGCTGTAGCAATTAGAGCCGAGTTGATACA---GCTAAGACTACTTTAAGTACATTAAAAG--GGCATTTAGAATCCTTAAAGGG-ATAGGT    |   |  |  |      |
|           |                   |      |        | 601                                                                                                   |   |  |  | 700  |
| Bh::Comp  | vmp <sub>Ex</sub> | Inoc | (529)  | GATGCTGGTGACCAATTGGTAATGTTGCTGCTGGTGGTGCTGGTGCGGGTACAGGTGCTATTGGGGATGGTGTGATAATCTAATAAATGGAATTAAGG    |   |  |  |      |
| Recovered | vmp <sub>Ex</sub> | C3H  | (595)  | GATG-----ACAAAGTAGTAG-GTTGG-GCAGAAAATGATCAACAAGGAATCAAACCAGCTGATGATGGATTGAATAAATTCCTTAATGCATTGCAGT    |   |  |  |      |
|           |                   |      |        | 701                                                                                                   |   |  |  | 800  |
| Bh::Comp  | vmp <sub>Ex</sub> | Inoc | (629)  | CAATTGTAGAAGTAGTACTTAAAGAAGGGAATGCTGAGGCTGGAGATGGTAAAAAGGCCGATGCTCTTGAGAGCAAGAGGTGCTAATGCTGGTGATGCAGG |   |  |  |      |
| Recovered | vmp <sub>Ex</sub> | C3H  | (686)  | CAATAGTAAAGGCAGCAACAGATGCAGGTGTTTTAGCACCAAAGCAGGGAATACAACATTGACAGTAAATGGGGTAGATAATAAGGATGGTGCTAAGGT   |   |  |  |      |
|           |                   |      |        | 801                                                                                                   |   |  |  | 900  |
| Bh::Comp  | vmp <sub>Ex</sub> | Inoc | (729)  | AA-AGTTATTTGGTAATACTGGTAATAATGGTGCTATTGATTCTGCAGATAATGCAAAGAAAGCAGGTGCTGATGCAGCAAAAGCAG---TAGGGGCAGT  |   |  |  |      |
| Recovered | vmp <sub>Ex</sub> | C3H  | (786)  | ATTAGCTATA-GATAAACAGGGGCAGCAGTAGGAGAAAAAGCATCATTAATAGTATCGGCAGTAAGTGAGAGGAAATACTAGCATCAATAGTTGCGTC    |   |  |  |      |
|           |                   |      |        | 901                                                                                                   |   |  |  | 1000 |
| Bh::Comp  | vmp <sub>Ex</sub> | Inoc | (825)  | AACAGGTGCTGATATATTACAAGCTATTTCTAAAGATGGTGGTGATGCTGCTA--AATTAGCTAAGAATAGTGCTACCGTTCAGGTGACTGGTGTGCTG   |   |  |  |      |
| Recovered | vmp <sub>Ex</sub> | C3H  | (885)  | AAAAGAAGGTGATCAAGCACTAGGAGCAGCTGCAGATGGAActACAactGCGATGAGTTTTGCAAAAGGAGGAACAAGGACAACCTATCAA--ATGCAA   |   |  |  |      |
|           |                   |      |        | 1001                                                                                                  |   |  |  | 1100 |
| Bh::Comp  | vmp <sub>Ex</sub> | Inoc | (923)  | TTGATGTTAAAGATGCGGTTATAGCAGGAGGAATTGCACTCAGAGCAATGGCAAAGGGTGGTAAATTTGCTAATGATAAGGATGCTGTTAATGCTGATGT  |   |  |  |      |
| Recovered | vmp <sub>Ex</sub> | C3H  | (983)  | ATACACCAAAGCAGCAGCAGTAGCAGGAGGAATAGCACTACGTTTCCTTAGTTAAAGATGGTAAATTAGCTTCACATAATGAT-----AATAGTGAA--   |   |  |  |      |
|           |                   |      |        | 1101                                                                                                  |   |  |  | 1200 |
| Bh::Comp  | vmp <sub>Ex</sub> | Inoc | (1023) | TGTTACTGCAGTTAAAGGAGCAACAGTAAGTGCAAGTAAGTAAAGCACTAGATACATTAACTATTGCAATAAGAAAAACAATTGACGCAGGCCTTAAACA  |   |  |  |      |
| Recovered | vmp <sub>Ex</sub> | C3H  | (1075) | ----AAAGCAGTACAAGCAGCAGGAGTAATTGCAGCAAATAAGTTATTAGTATCAGTAGAAGATCTAATTAAGAAGACAGTAAAGAATGTTCTTGAGAAA  |   |  |  |      |
|           |                   |      |        | 1201                                                                                                  |   |  |  | 1300 |
| Bh::Comp  | vmp <sub>Ex</sub> | Inoc | (1123) | GTTAAAGAAGCTATGAAAATTAATGCTAATGATACTCCTATAACTCCTGAGCAG-AATATCCCTAAAGCTACTACTAGTAACTAGTTAAGGATAAATATA  |   |  |  |      |
| Recovered | vmp <sub>Ex</sub> | C3H  | (1171) | GCAAAAGAA---AAATAGATAAAGCAAGAG---CTCCAAAGCAACAGGTGAGCAATA---AGATAGATAGTTAGATTAATTACTTAAAAGTAAGAGTA    |   |  |  |      |
|           |                   |      |        | 1301                                                                                                  |   |  |  | 1400 |
| Bh::Comp  | vmp <sub>Ex</sub> | Inoc | (1222) | AAGGATAAAGTCATTGTAAGGGAAAAGCTT--TTCT---TGTTTTTAATGCAGGAGT-GTAGTTTCTCTGA-----TTAAGTAAGCTGTAAGAGCA      |   |  |  |      |
| Recovered | vmp <sub>Ex</sub> | C3H  | (1262) | GAAGGCAATCTTAGAGATGCGTCTCAGATGCCTTCTATATTGTTGTAATGAAAAATAAGAAGTTATTATAAGATAAGTTATTAAAGTAAGCTGTAAGAGCA |   |  |  |      |
|           |                   |      |        | 1401                                                                                                  |   |  |  | 1500 |
| Bh::Comp  | vmp <sub>Ex</sub> | Inoc | (1307) | GGGAAAAATAAAGTCAAAAAGGAATAGGAAGCTAGGAGCGTAATGCTCTTAGCTTCTAATGTTATTATAGGGAGTGTTTCTTTGTATATAAAATTGTTTAT |   |  |  |      |
| Recovered | vmp <sub>Ex</sub> | C3H  | (1362) | GGGAAAAATAAAGTCAAAAAGAAATAGGAAGCTAGGAGCGTAATGCTCTTAGCTTCTAATGTTATTATAGGGAATGTTTATTGTATATAAAATTGTTTAT  |   |  |  |      |
|           |                   |      |        | 1501                                                                                                  |   |  |  | 1600 |
| Bh::Comp  | vmp <sub>Ex</sub> | Inoc | (1407) | ATGAGTAAAGATTGAATATAAAATAATTGCAAGTATGATATTAAGAGTATGTTTTTATTGTAATCAAATAATTAATACTTTAAAAGTAAGCTAAATGT    |   |  |  |      |
