# Supplementary material for: Cis‐acting DNA elements flanking the variable major protein expression site of Borrelia hermsii are required for murine persistence
Source: Microbiologyopen. 2017 Dec 17;7(3):e00569. doi: 10.1002/mbo3.569 (PMC6011951; doi:10.1002/mbo3.569)
Supplement: Supplementary file 5 [file MBO3-7-e00569-s005.pdf]

| Strain                | Gene              | Position | Sequence | Position |
|-----------------------|-------------------|----------|----------|----------|
| Bh::UHS <sub>AS</sub> | vmp <sub>Ex</sub> | Inoc     | (1)      | 1        |
| Recovered             | vmp <sub>Ex</sub> | C3H      | (1)      | 100      |
| Bh::UHS <sub>AS</sub> | vmp <sub>Ex</sub> | Inoc     | (101)    | 200      |
| Recovered             | vmp <sub>Ex</sub> | C3H      | (31)     | 200      |
| Bh::UHS <sub>AS</sub> | vmp <sub>Ex</sub> | Inoc     | (201)    | 300      |
| Recovered             | vmp <sub>Ex</sub> | C3H      | (131)    | 300      |
| Bh::UHS <sub>AS</sub> | vmp <sub>Ex</sub> | Inoc     | (301)    | 400      |
| Recovered             | vmp <sub>Ex</sub> | C3H      | (231)    | 400      |
| Bh::UHS <sub>AS</sub> | vmp <sub>Ex</sub> | Inoc     | (401)    | 500      |
| Recovered             | vmp <sub>Ex</sub> | C3H      | (331)    | 500      |
| Bh::UHS <sub>AS</sub> | vmp <sub>Ex</sub> | Inoc     | (501)    | 600      |
| Recovered             | vmp <sub>Ex</sub> | C3H      | (431)    | 600      |
| Bh::UHS <sub>AS</sub> | vmp <sub>Ex</sub> | Inoc     | (601)    | 700      |
| Recovered             | vmp <sub>Ex</sub> | C3H      | (531)    | 700      |
| Bh::UHS <sub>AS</sub> | vmp <sub>Ex</sub> | Inoc     | (701)    | 800      |
| Recovered             | vmp <sub>Ex</sub> | C3H      | (631)    | 800      |
| Bh::UHS <sub>AS</sub> | vmp <sub>Ex</sub> | Inoc     | (801)    | 900      |
| Recovered             | vmp <sub>Ex</sub> | C3H      | (731)    | 900      |
| Bh::UHS <sub>AS</sub> | vmp <sub>Ex</sub> | Inoc     | (901)    | 1000     |
| Recovered             | vmp <sub>Ex</sub> | C3H      | (831)    | 1000     |
| Bh::UHS <sub>AS</sub> | vmp <sub>Ex</sub> | Inoc     | (1001)   | 1100     |
| Recovered             | vmp <sub>Ex</sub> | C3H      | (931)    | 1100     |
| Bh::UHS <sub>AS</sub> | vmp <sub>Ex</sub> | Inoc     | (1101)   | 1200     |
| Recovered             | vmp <sub>Ex</sub> | C3H      | (1031)   | 1200     |
| Bh::UHS <sub>AS</sub> | vmp <sub>Ex</sub> | Inoc     | (1201)   | 1300     |
| Recovered             | vmp <sub>Ex</sub> | C3H      | (1131)   | 1300     |
| Bh::UHS <sub>AS</sub> | vmp <sub>Ex</sub> | Inoc     | (1301)   | 1400     |
| Recovered             | vmp <sub>Ex</sub> | C3H      | (1231)   | 1400     |
| Bh::UHS <sub>AS</sub> | vmp <sub>Ex</sub> | Inoc     | (1401)   | 1500     |
| Recovered             | vmp <sub>Ex</sub> | C3H      | (1331)   | 1500     |
| Bh::UHS <sub>AS</sub> | vmp <sub>Ex</sub> | Inoc     | (1501)   | 1576     |
| Recovered             | vmp <sub>Ex</sub> | C3H      | (1431)   | 1576     |
