# Supplementary material for: Cis‐acting DNA elements flanking the variable major protein expression site of Borrelia hermsii are required for murine persistence
Source: Microbiologyopen. 2017 Dec 17;7(3):e00569. doi: 10.1002/mbo3.569 (PMC6011951; doi:10.1002/mbo3.569)
Supplement: Supplementary file 7 [file MBO3-7-e00569-s007.pdf]

|           |                         |      |        | 401                                                                                                    | 500  |
|-----------|-------------------------|------|--------|--------------------------------------------------------------------------------------------------------|------|
| Wild type | <i>vmp<sub>Ex</sub></i> | Inoc | (401)  | TTGTTACTGACATGAAGAGAGAAGGAAATCCTAATGCTTCTGCAACTGAGACTGCGGTAAAAACACTAATTGATAATACTCTTG-ATAAGATAATAGAAG   |      |
| Recovered | <i>vmp<sub>Ex</sub></i> | SCID | (1)    | -----AAGTTTGTAACTTTGAAAGT--TGAGGTATAATGCTAATGCATAAGTTAAAAGGAG                                          |      |
|           |                         |      |        | 501                                                                                                    | 600  |
| Wild type | <i>vmp<sub>Ex</sub></i> | Inoc | (500)  | GTGCTGAGAC---TGCAAGTGAGGCTATTGGTGATGCTGGTGACCCAATTGGTAATGTTGCTGCTGGTGGTGCAGGTGCTATTGGGGA               |      |
| Recovered | <i>vmp<sub>Ex</sub></i> | SCID | (56)   | GCACGTAAAAAATGAGAAAAAGAATAAGTGCAATAATAATGACTTTATTTATGGTGTATTG-TCATG-TAATAATGGAGGTCCAGAGCTTAAAAGTGA     |      |
|           |                         |      |        | 601                                                                                                    | 700  |
| Wild type | <i>vmp<sub>Ex</sub></i> | Inoc | (597)  | TGGTGTGATAA-TCTAAT--AAATGGAATTAA---GGCAATTGTAGAAGTAGTACTTAAAGAAGGGAATGCTGAGGCTGGAGATGGTAAAAAGGCCGAT    |      |
| Recovered | <i>vmp<sub>Ex</sub></i> | SCID | (154)  | CGAAGTAGCCAAGTCTGACGGAACGACTTGTATTGGCAAAAATAAGTGCAAGATAAAAGAGGCTAGTGCTTTTGACGCAAGTGTTAAAGAAGTTCAT      |      |
|           |                         |      |        | 701                                                                                                    | 800  |
| Wild type | <i>vmp<sub>Ex</sub></i> | Inoc | (691)  | GCTCTTGG--AG-CAAGAGGTGCTAATGCTGGTGATGCAGGAAAAGTT-ATTTGGTAATACTGGTAATAATGGTGCTATTGATTCTGCAGATAATGCAAAG  |      |
| Recovered | <i>vmp<sub>Ex</sub></i> | SCID | (254)  | ACTTTAGTTAAGTCAGTAGATACGCTTGCTGGTGCTATTGGAAAGAAGATTAAAGTCCGA-TGGGAAGTTTGATGCTATGGCTGGTAAGAATGGATCATTG  |      |
|           |                         |      |        | 801                                                                                                    | 900  |
| Wild type | <i>vmp<sub>Ex</sub></i> | Inoc | (787)  | AAAGCAGGTGCTGATGCAGCAAAAGCAGTAGGGGCAGTAACAGGTGCTGATATATTACAAGCTATTTCTAAAGATGGTGGTGATGCTGCTAAATTAGCTA   |      |
| Recovered | <i>vmp<sub>Ex</sub></i> | SCID | (353)  | CTTGACGGGGCATAT-----AATGTTGCGTTGGATATAAATAGTAAATTGACAGTATTAGATGGT---AAGGCTGG-----ACTCT-CTTCTTTACTTA    |      |
|           |                         |      |        | 901                                                                                                    | 1000 |
| Wild type | <i>vmp<sub>Ex</sub></i> | Inoc | (887)  | AGAATAGTGCTACCGTTCAGGTGACTGGTGTGCTGTTGATGTTAAAGATGCGGTTATAGCAGGAGGAATTGCACTCAGAGCAATGGCAAAGGGTGGTAA    |      |
| Recovered | <i>vmp<sub>Ex</sub></i> | SCID | (438)  | AGGCAAAGGTTACTGCTGCAAAAAGTAGTGGTGAA--TCATTCTCAA-ATAAATTAAAAACCGAACATACTGACCTTGG--CAAAGA-AGAGGCTAGTGA   |      |
|           |                         |      |        | 1001                                                                                                   | 1100 |
| Wild type | <i>vmp<sub>Ex</sub></i> | Inoc | (987)  | ATTTGCTAATGATAAGGATGCTGTTAATGCTGATGTTGTTACTGCAGTTAAAGGAGCAACAGTAAGTGCACTAAAGCACTAGATACATTAAGTATT       |      |
| Recovered | <i>vmp<sub>Ex</sub></i> | SCID | (532)  | ---TGATAATGCAAAAGCAGCTTTACTTTGTAACAAATGCTACTAAAAATAAAGGGGTCACTGAGCTTG-----AAGCACTCAACACAGCAGTTGAT      |      |
|           |                         |      |        | 1101                                                                                                   | 1200 |
| Wild type | <i>vmp<sub>Ex</sub></i> | Inoc | (1087) | GCAATAAGAAAAACAATTGACGCAGGCCTTAAAAACAGTTAAAGAAGCTATGAAAAATTAATGCTAATGATACTCCTATAACTCCTGAGCAGAATATCCCTA |      |
| Recovered | <i>vmp<sub>Ex</sub></i> | SCID | (620)  | GCCTTGTTAAAGGCAGCTGAGGGTGA-----AGT---AGAAGCTGC---AATTAAAGAGCTTACAGCTCCTGTTAAG-----GTAGAA-----A         |      |
|           |                         |      |        | 1201                                                                                                   | 1300 |
| Wild type | <i>vmp<sub>Ex</sub></i> | Inoc | (1187) | AAGCTACTACTAGTAACTAGTTAAGGATAAAATATAAAGGATAAAGTCATTGTAAGGGAAAAGCTTTTCTTGTTTTTAATGCAGGAGTGTAGTTTCTCTGA  |      |
| Recovered | <i>vmp<sub>Ex</sub></i> | SCID | (693)  | AACCTTCTCAAAATAACTAACTAGGGAATAA-ATAATTTAAGAAGTTATTATAAGATAA-----GTT-----A                              |      |
|           |                         |      |        | 1301                                                                                                   | 1400 |
| Wild type | <i>vmp<sub>Ex</sub></i> | Inoc | (1287) | TTAAGTAAGCTGTAAGAGCAGGGAAAAATAAAGTCAAAAAGGAATAGGAAGCTAGGAGCGTAATGCTCTTAGCTTCTAATGTTATTTAGGGAGTGTCTTCT  |      |
| Recovered | <i>vmp<sub>Ex</sub></i> | SCID | (755)  | TTAAGTAAGCTGTAAGAGCAGGGAAAAATAAAGTCAAAAAGGAATAAGAAGCTAGGAGTGTAATGCTCTTAGCTTCTGATGTTATTTAGGGAATGTTTAT   |      |
|           |                         |      |        | 1401                                                                                                   | 1500 |
| Wild type | <i>vmp<sub>Ex</sub></i> | Inoc | (1387) | TTGTATATAAAATTGTTTATATGAGTAAAGATTGAATATAAAATAATTGCAAGTATGATATTAAGAGTATGTTTTTTATTGTAATCAAATAATTAA-TACTT |      |
| Recovered | <i>vmp<sub>Ex</sub></i> | SCID | (855)  | TTGTATATAAAATTGTTTATATGAGTAAAGATTGAATATAAAATAATTGCAAGTATGATATTAAGAGTATGTTTTTTATTGTAATCAAATAATTAAATACTT |      |
|           |                         |      |        | 1501                                                                                                   | 1585 |
| Wild type | <i>vmp<sub>Ex</sub></i> | Inoc | (1486) | TAAAAGTAAGCTAAATGTGTGGTAAGGGCAGCAAAAGGGAAATTGGGATAGATGTTGGAAGGAAAAGAAGCACTGGGGATGCGCA                  |      |
| Recovered | <i>vmp<sub>Ex</sub></i> | SCID | (955)  | TAAAAGTAAGCTAAATGTGTGGTAAGGGCAGC-----                                                                  |      |
